# Supplementary material for: Magnesium oxide-incorporated electrospun membranes inhibit bacterial infections and promote the healing process of infected wounds
Source: Royal Society of Chemistry journal article supplement (doi:10.1039/d1tb00217a), 2021-01-01
Supplement: d1tb00217a1.pdf [file d1tb00217a1.pdf]

## Supplementary Information

### 1. Methods

Electrospun solutions with or without MgO nanoparticles were prepared as described in '2.2 Preparation of MgO-incorporated electrospun membranes'. The solutions were photographed by a digital camera. The pH of solutions was measured using a digital pH meter ( $n = 4$  for each solution).

Murine macrophages (RAW 264.7 cell line) were obtained from the Cell Bank of the Chinese Academy of Sciences. Macrophages were seeded on the surface of electrospun membranes (22 mm diameter) at the density of  $5 \times 10^4$  cells per disc. Cells were incubated with Calcein-AM and propidium iodide for live/dead staining and imaged using a fluorescence microscope (DMi 8, Leica, Germany)

## 2. Results

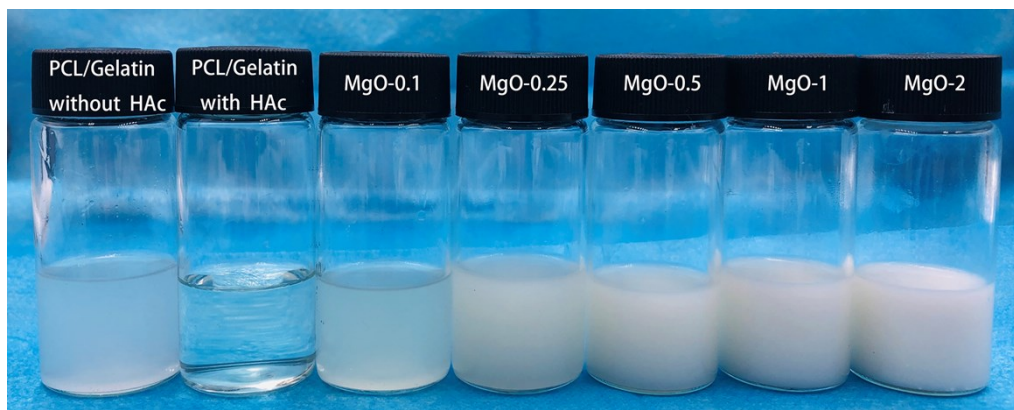

Fig. S1. Gross appearance of electrospun solutions.

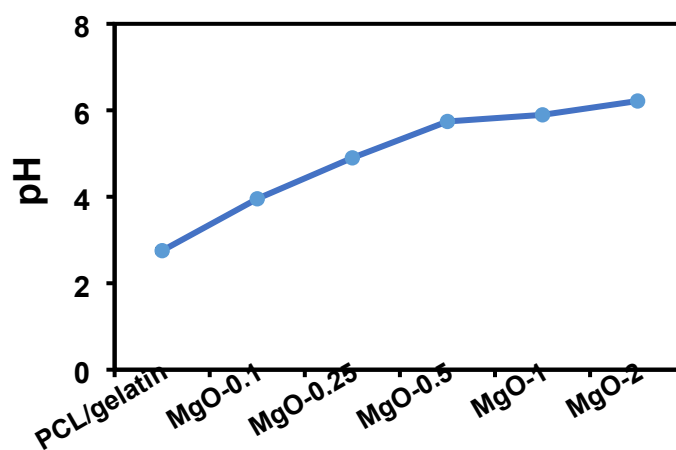

Fig. S2. pH of electrospun solutions.

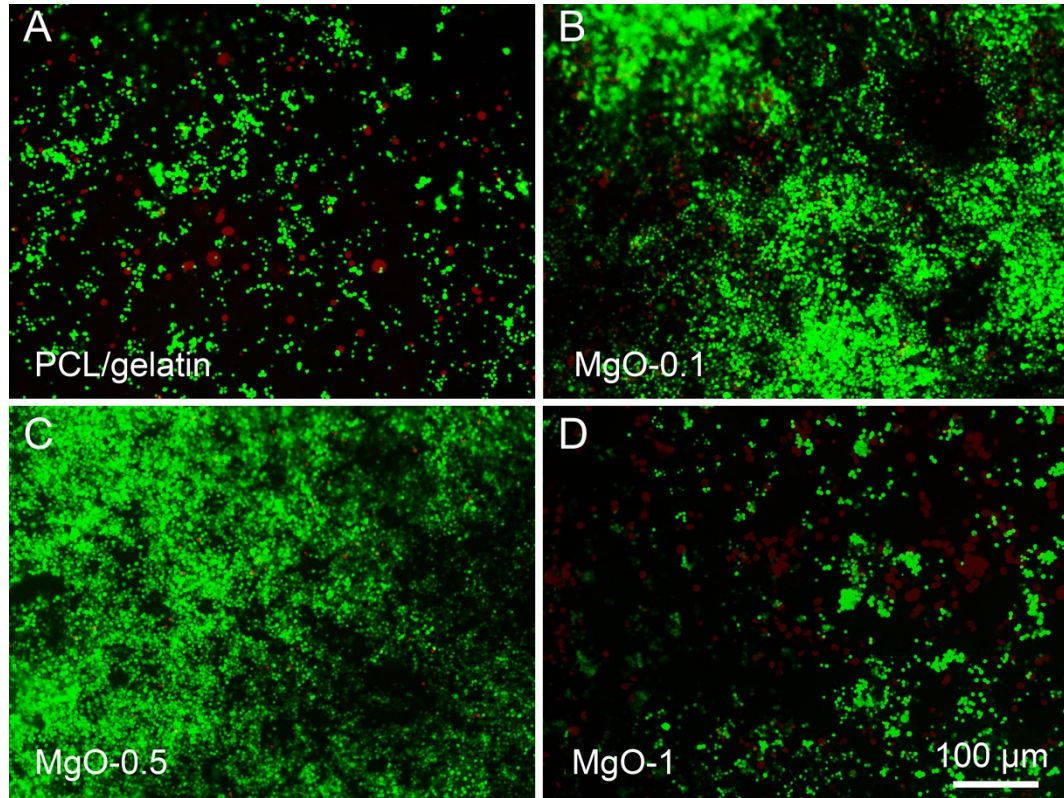

Fig. S3. Live/dead staining of murine macrophages on electrospun membranes. (A) PCL/gelatin, (B) MgO-0.1, (C) MgO-0.5, and (D) MgO-1.
